# Supplementary material
Source: PubMed Central journal article supplement (PMC3724403)
Supplement: NIHMS257918-supplement-Supp_Table_S1-_S2.pdf [file NIHMS257918-supplement-Supp_Table_S1-_S2.pdf]

#

**Supp. Table S1. List of dystrophin nonsense mutations used in this study**

#

| IDENTIFIERS AND PHENOTYPE |           |             | MUTATION |      |                   |           |
|---------------------------|-----------|-------------|----------|------|-------------------|-----------|
| Subject ID                | Diagnosis | Kindred ID# | Type     | Exon | cDNA <sup>a</sup> |           |
|                           |           |             |          |      | Protein           |           |
| 42970                     | BMD       | 9           | UGA      | 1    | c.9G>A            | p.Trp3X   |
| DR43194                   | BMD       | 9           | UGA      | 1    | c.9G>A            | p.Trp3X   |
| DR43043A                  | BMD       | 24          | UGA      | 1    | c.9G>A            | p.Trp3X   |
| DR43640                   | BMD       | 24          | UGA      | 1    | c.9G>A            | p.Trp3X   |
| DR43738                   | BMD       | 204         | UGA      | 1    | c.9G>A            | p.Trp3X   |
| DR43741                   | BMD       | 204         | UGA      | 1    | c.9G>A            | p.Trp3X   |
| DR43800                   | BMD       |             | UGA      | 1    | c.9G>A            | p.Trp3X   |
| DR43676                   | BMD       |             | UGA      | 1    | c.9G>A            | p.Trp3X   |
| 42969                     | DMD       | 61          | UAG      | 5    | c.355C>T          | p.Gln119X |
| OSU411                    | DMD       | 61          | UAG      | 5    | c.355C>T          | p.Gln119X |
| DR43272                   | DMD       |             | UGA      | 6    | c.429G>A          | p.Trp143X |
| DC0058                    | DMD       |             | UGA      | 6    | c.433C>T          | p.Arg145X |
| DR43239                   | DMD       |             | UGA      | 6    | c.433C>T          | p.Arg145X |
| DR43486                   | DMD       |             | UGA      | 6    | c.433C>T          | p.Arg145X |
| DR43490                   | DMD       |             | UGA      | 6    | c.440C>G          | p.Ser147X |
| DC0235                    | DMD       |             | UAG      | 6    | c.457C>T          | p.Gln153X |
| OSU474                    | DMD       |             | UAG      | 7    | c.565C>T          | p.Gln189X |
| DC0285                    | DMD       |             | UAG      | 7    | c.568C>T          | p.Gln190X |
| DC0256                    | DMD       |             | UAA      | 7    | c.580C>T          | p.Gln194X |
| DR43333                   | DMD       |             | UGA      | 7    | c.583C>T          | p.Arg195X |
| DR43392                   | DMD       |             | UGA      | 7    | c.583C>T          | p.Arg195X |
| 42985                     | DMD       |             | UAA      | 8    | c.709C>T          | p.Gln237X |
| DC0115                    | DMD       |             | UAG      | 8    | c.745C>T          | p.Gln249X |
| DC0110                    | DMD       |             | UAG      | 8    | c.799C>T          | p.Gln267X |
| DR43162                   | DMD       | 38          | UAG      | 9    | c.903C>G          | p.Tyr301X |
| DR43163                   | DMD       | 38          | UAG      | 9    | c.903C>G          | p.Tyr301X |
| DR43518                   | DMD       |             | UAA      | 10   | c.1012G>T         | p.Glu338X |
| DR43396                   | DMD       |             | UAA      | 10   | c.1093C>T         | p.gln365X |
| DR43144                   | DMD       |             | UAA      | 10   | c.1117G>T         | p.Glu373X |
| DR43116                   | DMD       |             | UAA      | 11   | c.1255G>T         | p.Glu419X |
| DC0457                    | DMD       | 215         | UAG      | 11   | c.1267C>T         | p.Gln423X |
| DC0068                    | DMD       |             | UAA      | 11   | c.1286C>A         | p.Ser429X |
| DR43362                   | DMD       |             | UAG      | 12   | c.1388G>A         | p.Trp463X |
| DC0281                    | DMD       |             | UAG      | 12   | c.1429G>T         | p.Glu477X |
| DC0002                    | DMD       | 14          | UAA      | 12   | c.1465C>T         | p.Gln489X |
| DR43483                   | DMD       |             | UGA      | 14   | c.1615C>T         | p.Arg539X |
| DC0001                    | DMD       |             | UGA      | 14   | c.1615C>T         | p.Arg539X |
| OSU398                    | DMD       |             | UAG      | 14   | c.1619G>A         | p.Trp540X |

#

| IDENTIFIERS AND PHENOTYPE |            |             | MUTATION   |           |                     |                   |
|---------------------------|------------|-------------|------------|-----------|---------------------|-------------------|
| Subject ID                | Diagnosis  | Kindred ID# | Type       | Exon      | cDNA <sup>a</sup>   | Protein           |
| DR43225                   | DMD        |             | UAA        | 14        | c.1663C>T           | p.Gln555X         |
| OSU396                    | DMD        |             | UAA        | 14        | c.1663C>T           | p.Gln555X         |
| DR43689                   | DMD        |             | UAG        | 14        | c.1702C>T           | p.Gln568X         |
| DR43109                   | DMD        | 40          | UAA        | 15        | c.1783G>T           | p.Glu595X         |
| DC0063                    | DMD        |             | UGA        | 15        | c.1793C>G           | p.Ser598X         |
| 43018                     | DMD        | 12          | UAA        | 16        | c.1961T>A           | p.Leu654X         |
| DR43759                   | DMD        |             | UAA        | 16        | c.1966C>T           | p.Gln656X         |
| OSU414                    | DMD        |             | UAG        | 16        | c.1990C>T           | p.Gln664X         |
| DC0419                    | DMD        |             | UAG        | 17        | c.2077C>T           | p.Gln693X         |
| OSU353                    | DMD        |             | UAG        | 19        | c.2299G>T           | p.Glu767X         |
| DC0435                    | DMD        | 217         | UAG        | 19        | c.2317A>T           | p.Lys773X         |
| DR43595                   | DMD        |             | UAA        | 20        | c.2404A>T           | p.Lys802X         |
| DR43766                   | DMD        |             | UAA        | 20        | c.2416G>T           | p.Glu806X         |
| DR43607                   | DMD        | 213         | UAG        | 20        | c.2479G>T           | p.Glu827X         |
| 43016                     | DMD        |             | UAG        | 20        | c.2479G>T           | p.Glu827X         |
| DR43249                   | DMD        |             | UAG        | 20        | c.2485C>T           | p.Gln829X         |
| DC0149                    | DMD        | 108         | UAA        | 20        | c.2521C>T           | p.Gln841X         |
| DR43721                   | DMD        |             | UGA        | 20        | c.2582C>G           | p.Ser861X         |
| DC0278                    | DMD        | 194         | UAA        | 20        | c.2611A>T           | p.Lys871X         |
| DC0220                    | DMD        |             | UAA        | 21        | c.2758C>T           | p.Gln920X         |
| DR43688                   | DMD        |             | UAA        | 21        | c.2788A>T           | p.Lys930X         |
| 43015                     | DMD        |             | UGA        | 22        | c.2862G>A           | p.Trp954X         |
| DR43303                   | DMD        |             | UAG        | 23        | c.2991C>G           | p.Tyr997X         |
| DR43212                   | DMD        | 75          | UAA        | 23        | c.3121C>T           | p.Gln1041X        |
| D46952                    | DMD        |             | UAG        | 24        | c.3217G>T           | p.Glu1073X        |
| OSU364                    | DMD        |             | UAA        | 24        | c.3220G>T           | p.Glu1074X        |
| DR43228                   | DMD        | 86          | UAG        | 24        | c.3224G>A           | p.Trp1075X        |
| 43039                     | DMD        |             | UAG        | 24        | c.3268C>T           | p.Gln1090X        |
| DC0257                    | DMD        |             | UGA        | 25        | c.3281T>G           | p.Leu1094X        |
| DR43302                   | DMD        |             | UAG        | 25        | c.3304C>T           | p.Gln1102X        |
| <b>DC0366</b>             | <b>BMD</b> |             | <b>UAG</b> | <b>25</b> | <b>c.3340A&gt;T</b> | <b>p.Lys1114X</b> |
| OSU341                    | DMD        |             | UAG        | 25        | c.3430C>T           | p.Gln1144X        |
| 43013                     | DMD        | 4           | UGA        | 26        | c.3500C>G           | p.Ser1167X        |
| 43014                     | DMD        | 4           | UGA        | 26        | c.3500C>G           | p.Ser1167X        |
| DR43223                   | IMD        |             | UGA        | 26        | c.3500C>G           | p.Ser1167X        |
| 42994                     | DMD        | 11          | UAG        | 26        | c.3544G>T           | p.Glu1182X        |
| DR43501                   | DMD        | 193         | UAG        | 26        | c.3580C>T           | p.Gln1194X        |
| DC0153                    | DMD        |             | UAA        | 27        | c.3622C>T           | p.Gln1208X        |
| <b>DR43327</b>            | <b>BMD</b> |             | <b>UAG</b> | <b>27</b> | <b>c.3700G&gt;T</b> | <b>p.Glu1234X</b> |
| DR43282                   | DMD        |             | UGA        | 28        | c.3804G>A           | p.Trp1268X        |
| DR43480                   | IMD        | 121         | UAA        | 28        | c.3822C>A           | p.Tyr1274X        |

| IDENTIFIERS AND PHENOTYPE |            |             | MUTATION   |           |                     |                   |
|---------------------------|------------|-------------|------------|-----------|---------------------|-------------------|
| Subject ID                | Diagnosis  | Kindred ID# | Type       | Exon      | cDNA <sup>a</sup>   | Protein           |
| DR43481                   | IMD        | 121         | UAA        | 28        | c.3822C>A           | p.Tyr1274X        |
| DR43147                   | DMD        |             | UAA        | 28        | c.3868A>T           | p.Lys1290X        |
| <b>DRVH43377</b>          | <b>BMD</b> | <b>87</b>   | <b>UAG</b> | <b>29</b> | <b>c.3982C&gt;T</b> | <b>p.Gln1328X</b> |
| <b>DRVH43376</b>          | <b>BMD</b> | <b>87</b>   | <b>UAG</b> | <b>29</b> | <b>c.3982C&gt;T</b> | <b>p.Gln1328X</b> |
| <b>43017</b>              | <b>BMD</b> |             | <b>UAG</b> | <b>29</b> | <b>c.4012G&gt;T</b> | <b>p.Glu1338X</b> |
| DC0268                    | DMD        |             | UAG        | 30        | c.4108C>T           | p.Gln1370X        |
| 43040                     | DMD        |             | UAG        | 30        | c.4150G>T           | p.Glu1384X        |
| DR43174                   | IMD        |             | UAA        | 30        | c.4213C>T           | p.Gln1405X        |
| <b>42719</b>              | <b>BMD</b> |             | <b>UAA</b> | <b>31</b> | <b>c.4240C&gt;T</b> | <b>p.Gln1414X</b> |
| <b>42588</b>              | <b>BMD</b> | <b>32</b>   | <b>UAG</b> | <b>31</b> | <b>c.4250T&gt;A</b> | <b>p.Leu1417X</b> |
| <b>DR43140</b>            | <b>BMD</b> | <b>32</b>   | <b>UAG</b> | <b>31</b> | <b>c.4250T&gt;A</b> | <b>p.Leu1417X</b> |
| <b>DR43139</b>            | <b>BMD</b> | <b>32</b>   | <b>UAG</b> | <b>31</b> | <b>c.4250T&gt;A</b> | <b>p.Leu1417X</b> |
| <b>DR43217</b>            | <b>BMD</b> |             | <b>UAA</b> | <b>31</b> | <b>c.4285A&gt;T</b> | <b>p.Lys1429X</b> |
| DR43661                   | DMD        |             | UAA        | 32        | c.4352T>A           | p.Leu1451X        |
| DC0201                    | DMD        |             | UAG        | 32        | c.4405C>T           | p.Gln1469X        |
| DC0030                    | DMD        | 44          | UAA        | 32        | c.4414C>T           | p.Gln1472X        |
| DR43735                   | DMD        |             | UAG        | 32        | c.4483C>T           | p.Gln1495X        |
| 42964                     | DMD        | 8           | UAG        | 34        | c.4693C>T           | p.Gln1565X        |
| 42986                     | DMD        |             | UAG        | 34        | c.4693C>T           | p.Gln1565X        |
| DR43193                   | DMD        |             | UAG        | 34        | c.4693C>T           | p.Gln1565X        |
| DC0455                    | DMD        |             | UAG        | 34        | c.4697T>A           | p.Leu1566X        |
| 43021                     | DMD        | 174         | UGA        | 34        | c.4729C>T           | p.Arg1577X        |
| DC0241                    | DMD        |             | UAA        | 34        | c.4793C>A           | p.Ser1598X        |
| DC0302                    | DMD        |             | UAG        | 35        | c.4864G>T           | p.Glu1622X        |
| OSU312                    | DMD        |             | UAG        | 35        | c.4870C>T           | p.Gln1624X        |
| DR43580                   | DMD        |             | UGA        | 35        | c.4996C>T           | p.Arg1666X        |
| DR43587                   | DMD        |             | UAA        | 36        | c.5134C>T           | p.Gln1712X        |
| DR43651                   | DMD        | 180         | UAA        | 36        | c.5140G>T           | p.Glu1714X        |
| DR43650                   | DMD        | 180         | UAA        | 36        | c.5140G>T           | p.Glu1714X        |
| DC0006                    | DMD        | 23          | UGA        | 37        | c.5255T>G           | p.Leu1752X        |
| <b>DR43544</b>            | <b>BMD</b> | <b>141</b>  | <b>UGA</b> | <b>37</b> | <b>c.5287C&gt;T</b> | <b>p.Arg1763X</b> |
| <b>DR43543</b>            | <b>BMD</b> | <b>141</b>  | <b>UGA</b> | <b>37</b> | <b>c.5287C&gt;T</b> | <b>p.Arg1763X</b> |
| <b>DR43542</b>            | <b>BMD</b> | <b>141</b>  | <b>UGA</b> | <b>37</b> | <b>c.5287C&gt;T</b> | <b>p.Arg1763X</b> |
| DC0171                    | DMD        |             | UAA        | 38        | c.5344G>T           | p.Glu1782X        |
| <b>DR43317</b>            | <b>BMD</b> |             | <b>UAA</b> | <b>38</b> | <b>c.5371C&gt;T</b> | <b>p.Gln1791X</b> |
| <b>43024</b>              | <b>BMD</b> | <b>5</b>    | <b>UAA</b> | <b>38</b> | <b>c.5398G&gt;T</b> | <b>p.Glu1800X</b> |
| <b>43023</b>              | <b>BMD</b> | <b>5</b>    | <b>UAA</b> | <b>38</b> | <b>c.5398G&gt;T</b> | <b>p.Glu1800X</b> |
| <b>DR43153</b>            | <b>BMD</b> |             | <b>UAG</b> | <b>38</b> | <b>c.5404C&gt;T</b> | <b>p.Gln1802X</b> |
| DR43198                   | DMD        |             | UGA        | 39        | c.5530C>T           | p.Arg1844X        |
| DR43184                   | DMD        | 76          | UAG        | 39        | c.5563C>T           | p.Gln1855X        |
| DC0123                    | DMD        | 126         | UAA        | 40        | c.5608A>T           | p.Lys1870X        |

| IDENTIFIERS AND PHENOTYPE |            |             | MUTATION   |           |                              |                   |
|---------------------------|------------|-------------|------------|-----------|------------------------------|-------------------|
| Subject ID                | Diagnosis  | Kindred ID# | Type       | Exon      | cDNA <sup>a</sup>            | Protein           |
| DC0059                    | DMD        | 51          | UGA        | 40        | c.5637G>A                    | p.Trp1879X        |
| DC0303                    | DMD        |             | UAA        | 40        | c.5646C>A                    | p.Tyr1882X        |
| DC0283                    | DMD        |             | UAG        | 40        | c.5653C>T                    | p.Gln1885X        |
| <b>DC0165</b>             | <b>BMD</b> |             | <b>UAA</b> | <b>40</b> | <b>c.5725G&gt;T</b>          | <b>p.Glu1909X</b> |
| DC0239                    | DMD        | 142         | UAA        | 41        | c.5752G>T                    | p.Glu1918X        |
| 43003                     | DMD        | 36          | UAG        | 41        | c.5758C>T                    | p.Gln1920X        |
| DC0367                    | DMD        | 36          | UAG        | 41        | c.5758C>T                    | p.Gln1920X        |
| DR43124                   | DMD        |             | UAG        | 41        | c.5800G>T                    | p.Glu1934X        |
| DC0282                    | DMD        | 223         | UAG        | 41        | c.5867G>A                    | p.Trp1956X        |
| 43005                     | DMD        | 17          | UGA        | 41        | c.5899C>T                    | p.Arg1967X        |
| DC0159                    | DMD        |             | UGA        | 41        | c.5899C>T                    | p.Arg1967X        |
| OSU423                    | DMD        |             | UGA        | 41        | c.5899C>T                    | p.Arg1967X        |
| DR43271                   | DMD        |             | UGA        | 41        | c.5902A>T                    | p.Arg1968X        |
| OSU382                    | DMD        |             | UAA        | 41        | c.5917C>T                    | p.Gln1973X        |
| DC0166                    | DMD        | 122         | UAG        | 42        | c.6103G>T                    | p.Glu2035X        |
| DC0167                    | DMD        | 122         | UAG        | 42        | c.6103G>T                    | p.Glu2035X        |
| DC0166                    | DMD        | 122         | UAG        | 42        | c.6103G>T                    | p.Glu2035X        |
| OSU391                    | DMD        |             | UAG        | 42        | c.6103G>T                    | p.Glu2035X        |
| <b>DC0077</b>             | <b>BMD</b> |             | <b>UGA</b> | <b>43</b> | <b>c.6255G&gt;A</b>          | <b>p.Trp2085X</b> |
| DR43291                   | DMD        | 65          | UGA        | 43        | c.6283C>T                    | p.Arg2095X        |
| DR43408                   | DMD        |             | UGA        | 44        | c.6292C>T                    | p.Arg2098X        |
| DC0432                    | DMD        |             | UAG        | 44        | c.6352C>T                    | p.Gln2118X        |
| DR43306                   | DMD        | 70          | UAA        | 44        | c.6391C>T                    | p.Gln2131X        |
| DR43049A                  | DMD        | 70          | UAA        | 44        | c.6391C>T                    | p.Gln2131X        |
| DC0260                    | DMD        |             | UAG        | 45        | c.6445C>T                    | p.Gln2149X        |
| DC0019                    | DMD        |             | UAG        | 45        | c.6460C>T                    | p.Gln2154X        |
| DR43737                   | DMD        |             | UAG        | 45        | c.6544C>T                    | p.Gln2182X        |
| DC0192                    | DMD        |             | UAA        | 46        | c.6641C>A                    | p.Ser2214X        |
| DC0377                    | DMD        | 212         | UAA        | 46        | c.6649C>T                    | p.Gln2217X        |
| 43030                     | DMD        |             | UAA        | 47        | c.6856G>T                    | p.Glu2286X        |
| 42172                     | DMD        |             | UAA        | 47        | c.6868A>T                    | p.Lys2290X        |
| DR43447                   | DMD        |             | UAA        | 48        | c.7075C>T                    | p.Gln2359X        |
| <b>DR43441</b>            | <b>BMD</b> |             | <b>UAG</b> | <b>51</b> | <b>c.7401_7402delGGinsAT</b> | <b>p.Glu2468X</b> |
| DC0040                    | DMD        | 84          | UAG        | 52        | c.7576C>T                    | p.Gln2526X        |
| DC0044                    | DMD        |             | UGA        | 52        | c.7657C>T                    | p.Arg2553X        |
| DR43247                   | DMD        |             | UAG        | 53        | c.7682G>A                    | p.Trp2561X        |
| DR43723                   | DMD        |             | UAA        | 53        | c.7693C>T                    | p.Gln2565X        |
| 42962                     | DMD        |             | UAG        | 53        | c.7720C>T                    | p.Gln2574X        |
| DR43482                   | DMD        |             | UGA        | 53        | c.7814C>G                    | p.Ser2605X        |
| DC0045                    | DMD        |             | UAG        | 53        | c.7822G>T                    | p.Glu2608X        |

| IDENTIFIERS AND PHENOTYPE |            |             | MUTATION   |           |                     |                   |
|---------------------------|------------|-------------|------------|-----------|---------------------|-------------------|
| Subject ID                | Diagnosis  | Kindred ID# | Type       | Exon      | cDNA <sup>a</sup>   | Protein           |
| DC0306                    | DMD        |             | UGA        | 55        | c.8038C>T           | p.Arg2680X        |
| DC0194                    | DMD        | 158         | UAG        | 55        | c.8146C>T           | p.Gln2716X        |
| DC0264                    | DMD        |             | UAG        | 55        | c.8161A>T           | p.Lys2721X        |
| <b>DC0234</b>             | <b>BMD</b> |             | <b>UAG</b> | <b>56</b> | <b>c.8353A&gt;T</b> | <b>p.Lys2785X</b> |
| DC0114                    | DMD        |             | UAG        | 56        | c.8357G>A           | p.Trp2786X        |
| DR43219                   | DMD        |             | UAA        | 56        | c.8371A>T           | p.Lys2791X        |
| D06332                    | DMD        |             | UGA        | 57        | c.8460G>A           | p.Trp2820X        |
| DR43363                   | DMD        |             | UAG        | 57        | c.8464C>T           | p.Gln2822X        |
| DR43170                   | DMD        |             | UAG        | 57        | c.8491C>T           | p.Gln2831X        |
| DC0183                    | DMD        |             | UAG        | 57        | c.8527A>T           | p.Lys2843X        |
| 42968                     | DMD        | 188         | UGA        | 58        | c.8608C>T           | p.Arg2870X        |
| OSU370                    | DMD        |             | UGA        | 58        | c.8608C>T           | p.Arg2870X        |
| DR43692                   | DMD        | 197         | UGA        | 59        | c.8713C>T           | p.Arg2905X        |
| 43022                     | DMD        |             | UGA        | 59        | c.8713C>T           | p.Arg2905X        |
| OSU373                    | DMD        |             | UGA        | 59        | c.8713C>T           | p.Arg2905X        |
| 43009                     | DMD        |             | UGA        | 59        | c.8775G>A           | p.Trp2925X        |
| DR43493                   | DMD        |             | UGA        | 59        | c.8872G>T           | p.Gly2958X        |
| OSU362                    | DMD        |             | UGA        | 60        | c.8944C>T           | p.Arg2982X        |
| DR43186                   | DMD        | 249         | UAG        | 60        | c.9082C>T           | p.Gln3028X        |
| DR43145                   | DMD        | 35          | UGA        | 61        | c.9100C>T           | p.Arg3034X        |
| DC0083                    | DMD        |             | UAG        | 62        | c.9182G>A           | p.Trp3061X        |
| 42953                     | DMD        |             | UGA        | 64        | c.9337C>T           | p.Arg3113X        |
| DC0029                    | DMD        |             | UGA        | 64        | c.9337C>T           | p.Arg3113X        |
| DR43273                   | DMD        |             | UGA        | 64        | c.9337C>T           | p.Arg3113X        |
| OSU363                    | DMD        |             | UAG        | 64        | c.9346C>T           | p.Gln3116X        |
| 43007                     | DMD        | 62          | UGA        | 65        | c.9380C>G           | p.Ser3127X        |
| DR43229                   | DMD        | 62          | UGA        | 65        | c.9380C>G           | p.Ser3127X        |
| 42992                     | DMD        |             | UGA        | 65        | c.9380C>G           | p.Ser3127X        |
| OSU346                    | DMD        |             | UAG        | 65        | c.9427C>T           | p.Gln3143X        |
| DR43450                   | DMD        |             | UGA        | 66        | c.9568C>T           | p.Arg3190X        |
| D42687                    | DMD        |             | UGA        | 66        | c.9568C>T           | p.Arg3190X        |
| OSU407                    | DMD        |             | UAG        | 68        | c.9928C>T           | p.Gln3310X        |
| DR43492                   | DMD        |             | UAG        | 68        | c.9952G>T           | p.Glu3318X        |
| DR43720                   | DMD        |             | UAA        | 69        | c.10012C>T          | p.Gln3338X        |
| DR43244                   | DMD        | 220         | UGA        | 69        | c.10033C>T          | p.Arg3345X        |
| DC0118                    | DMD        |             | UAG        | 69        | c.9978C>G           | p.Tyr3326X        |
| DC0233                    | DMD        | 195         | UGA        | 70        | c.10108C>T          | p.Arg3370X        |
| DR43004A                  | DMD        | 205         | UGA        | 70        | c.10108C>T          | p.Arg3370X        |
| DR43701                   | DMD        | 205         | UGA        | 70        | c.10108C>T          | p.Arg3370X        |
| DR43263                   | DMD        | 71          | UGA        | 70        | c.10141C>T          | p.Arg3381X        |
| 35752                     | DMD        |             | UGA        | 70        | c.10141C>T          | p.Arg3381X        |

| IDENTIFIERS AND PHENOTYPE |            |             | MUTATION   |           |                      |                   |
|---------------------------|------------|-------------|------------|-----------|----------------------|-------------------|
| Subject ID                | Diagnosis  | Kindred ID# | Type       | Exon      | cDNA <sup>a</sup>    |                   |
|                           |            |             |            |           | Protein              |                   |
| OSU387                    | DMD        | 259         | UGA        | 70        | c.10141C>T           | p.Arg3381X        |
| DC0206                    | DMD        |             | UGA        | 70        | c.10141C>T           | p.Arg3381X        |
| DR43771                   | DMD        | 259         | UGA        | 70        | c.10141C>T           | p.Arg3381X        |
| DR43114                   | DMD        | 218         | UGA        | 70        | c.10171C>T           | p.Arg3391X        |
| DR43397                   | DMD        |             | UGA        | 70        | c.10171C>T           | p.Arg3391X        |
| DR43234                   | DMD        |             | UGA        | 70        | c.10171C>T           | p.Arg3391X        |
| DRVH43502                 | DMD        |             | UAG        | 76        | c.10801C>T           | p.Gln3601X        |
| <b>DC0254</b>             | <b>BMD</b> |             | <b>UGA</b> | <b>76</b> | <b>c.10888C&gt;T</b> | <b>p.Arg3630X</b> |
| OSU309                    | DMD        |             | UAA        | 76        | c.10903C>T           | p.Gln3635X        |

#

<sup>a</sup> reference GenBank sequence NM\_004006.2. Nucleotide numbering reflects cDNA numbering with +1 corresponding to the A of the ATG translation initiation codon in the reference sequence, according to journal guidelines ([www.hgvs.org/mutnomen](http://www.hgvs.org/mutnomen)). The initiation codon is codon 1.

#

**Supp. Table S2. Disruption of ESE or creation of ESS sites by nonsense mutations for in-frame exons associated with BMD phenotypes**

#

|                       |                  | Disruption of ESE = 1, no effect = 0 |                     |                     |                              |                        | Creation of ESS = 1, no effect = 0 |                     |        |                                    |                              |              |
|-----------------------|------------------|--------------------------------------|---------------------|---------------------|------------------------------|------------------------|------------------------------------|---------------------|--------|------------------------------------|------------------------------|--------------|
| Mutation <sup>a</sup> | Exon (phenotype) | hexESE                               | ESE Finder matrices | RESCUE ESE hexamers | PESE                         |                        |                                    | ESE motifs from HSF | hexESS | Silencer motifs from Sironi et al. | PESS                         |              |
|                       |                  |                                      |                     |                     | Octamers from Zhang & Chasin | EIEs from Zhang et al. | ESE motifs from HSF                |                     |        |                                    | Octamers from Zhang & Chasin | hnRNP motifs |
| c.3328G>T             | 25 (BMD)         | 1                                    | 0                   | 1                   | 0                            | 1                      | 1                                  | 0                   | 0      | 0                                  | 0                            |              |
| c.3337C>T             | 25 (BMD)         | 1                                    | 1                   | 1                   | 1                            | 1                      | 1                                  | 1                   | 0      | 0                                  | 1                            |              |
| c.3340A>T             | 25 (BMD)         | 1                                    | 1                   | 1                   | 1                            | 1                      | 1                                  | 0                   | 0      | 0                                  | 1                            |              |
| c.3631G>T             | 27 (BMD)         | 1                                    | 0                   | 1                   | 1                            | 1                      | 1                                  | 1                   | 0      | 1                                  | 1                            |              |
| c.3700G>T             | 27 (BMD)         | 1                                    | 1                   | 1                   | 1                            | 1                      | 1                                  | 0                   | 0      | 0                                  | 0                            |              |
| c.3935T>A             | 29 (BMD)         | 0                                    | 0                   | 0                   | 0                            | 0                      | 0                                  | 0                   | 1      | 1                                  | 1                            |              |
| c.3940C>T             | 29 (BMD)         | 0                                    | 1                   | 0                   | 0                            | 1                      | 0                                  | 0                   | 0      | 0                                  | 0                            |              |
| c.3982C>T             | 29 (BMD)         | 1                                    | 1                   | 0                   | 0                            | 1                      | 0                                  | 0                   | 1      | 0                                  | 1                            |              |
| c.4012G>T             | 29 (BMD)         | 1                                    | 0                   | 1                   | 0                            | 1                      | 0                                  | 0                   | 0      | 0                                  | 1                            |              |
| c.4240C>T             | 31 (BMD)         | 1                                    | 0                   | 1                   | 0                            | 0                      | 0                                  | 0                   | 0      | 0                                  | 0                            |              |
| c.4250T>A             | 31 (BMD)         | 0                                    | 0                   | 0                   | 0                            | 1                      | 0                                  | 0                   | 0      | 0                                  | 1                            |              |
| c.4285A>T             | 31 (BMD)         | 1                                    | 0                   | 1                   | 1                            | 1                      | 1                                  | 0                   | 0      | 0                                  | 0                            |              |
| c.4294C>T             | 31 (BMD)         | 1                                    | 1                   | 1                   | 0                            | 1                      | 0                                  | 1                   | 1      | 1                                  | 0                            |              |
| c.5260G>T             | 37 (BMD)         | 0                                    | 1                   | 0                   | 0                            | 1                      | 1                                  | 1                   | 1      | 1                                  | 1                            |              |
| c.5287C>T             | 37 (BMD)         | 0                                    | 0                   | 0                   | 0                            | 1                      | 0                                  | 0                   | 0      | 0                                  | 0                            |              |
| c.5371C>T             | 38 (BMD)         | 0                                    | 0                   | 0                   | 0                            | 1                      | 0                                  | 1                   | 0      | 1                                  | 0                            |              |
| c.5398G>T             | 38 (BMD)         | 1                                    | 0                   | 1                   | 0                            | 1                      | 1                                  | 0                   | 0      | 0                                  | 0                            |              |
| c.5404C>T             | 38 (BMD)         | 1                                    | 1                   | 1                   | 0                            | 1                      | 0                                  | 0                   | 0      | 0                                  | 1                            |              |
| c.5407C>T             | 38 (BMD)         | 1                                    | 1                   | 0                   | 0                            | 0                      | 0                                  | 1                   | 0      | 0                                  | 0                            |              |
| c.5480T>A             | 39 (BMD)         | 0                                    | 0                   | 0                   | 0                            | 1                      | 0                                  | 1                   | 0      | 0                                  | 1                            |              |
| c.5725G>T             | 40 (BMD)         | 1                                    | 1                   | 1                   | 0                            | 1                      | 0                                  | 0                   | 0      | 0                                  | 1                            |              |
| c.3281T>G             | 25 (DMD)         | 0                                    | 0                   | 0                   | 0                            | 0                      | 0                                  | 0                   | 0      | 0                                  | 0                            |              |
| c.3304C>T             | 25 (DMD)         | 1                                    | 1                   | 1                   | 1                            | 1                      | 0                                  | 0                   | 0      | 1                                  | 1                            |              |
| c.3397G>T             | 25 (DMD)         | 1                                    | 0                   | 1                   | 0                            | 1                      | 1                                  | 0                   | 0      | 0                                  | 0                            |              |

#

| Mutation <sup>a</sup>         | Exon<br>(phenotype) | PESE   |                           |                           |                                       |                                 |                              | Silencer                           | PES                                   | hnRNP<br>motifs |       |
|-------------------------------|---------------------|--------|---------------------------|---------------------------|---------------------------------------|---------------------------------|------------------------------|------------------------------------|---------------------------------------|-----------------|-------|
|                               |                     | hexESE | ESE<br>Finder<br>matrices | RESCUE<br>ESE<br>hexamers | Octamers<br>from<br>Zhang &<br>Chasin | EIEs<br>from<br>Zhang<br>et al. | ESE<br>motifs<br>from<br>HSF | motifs<br>from<br>Sironi<br>et al. | Octamers<br>from<br>Zhang &<br>Chasin |                 |       |
| c.3427C>T                     | 25 (DMD)            | 1      | 0                         | 0                         | 0                                     | 1                               | 1                            | 0                                  | 0                                     | 0               | 0     |
| c.3430C>T                     | 25 (DMD)            | 1      | 0                         | 0                         | 0                                     | 1                               | 1                            | 0                                  | 0                                     | 0               | 0     |
| c.3622C>T                     | 27 (DMD)            | 1      | 0                         | 0                         | 1                                     | 1                               | 0                            | 0                                  | 1                                     | 0               | 0     |
| c.3746G>A                     | 27 (DMD)            | 0      | 1                         | 0                         | 0                                     | 1                               | 0                            | 0                                  | 0                                     | 0               | 1     |
| c.5255T>G                     | 37 (DMD)            | 0      | 0                         | 0                         | 0                                     | 0                               | 0                            | 1                                  | 1                                     | 0               | 0     |
| c.5344G>T                     | 38 (DMD)            | 1      | 0                         | 1                         | 1                                     | 1                               | 1                            | 0                                  | 0                                     | 0               | 0     |
| c.5363C>G                     | 38 (DMD)            | 0      | 0                         | 0                         | 0                                     | 1                               | 0                            | 0                                  | 1                                     | 0               | 0     |
| c.5530C>T                     | 39 (DMD)            | 1      | 0                         | 1                         | 0                                     | 1                               | 1                            | 0                                  | 1                                     | 0               | 0     |
| c.5551C>T                     | 39 (DMD)            | 1      | 0                         | 1                         | 1                                     | 1                               | 0                            | 1                                  | 0                                     | 0               | 1     |
| c.5563C>T                     | 39 (DMD)            | 1      | 1                         | 1                         | 0                                     | 1                               | 0                            | 1                                  | 0                                     | 0               | 1     |
| c.5608A>T                     | 40 (DMD)            | 1      | 0                         | 1                         | 0                                     | 1                               | 1                            | 0                                  | 0                                     | 0               | 0     |
| c.5637G>A                     | 40 (DMD)            | 0      | 1                         | 0                         | 0                                     | 0                               | 0                            | 0                                  | 0                                     | 0               | 0     |
| c.5646C>A                     | 40 (DMD)            | 0      | 1                         | 1                         | 0                                     | 1                               | 0                            | 0                                  | 0                                     | 0               | 0     |
| c.5653C>T                     | 40 (DMD)            | 0      | 0                         | 0                         | 0                                     | 0                               | 0                            | 1                                  | 1                                     | 0               | 0     |
| BMD site change               |                     | 13/21  | 9/21                      | 11/21                     | 5/21                                  | 17/21                           | 8/21                         | 7/21                               | 4/21                                  | 5/21            | 10/21 |
| DMD site change               |                     | 10/17  | 5/17                      | 8/17                      | 4/17                                  | 13/17                           | 6/17                         | 4/17                               | 5/17                                  | 1/17            | 4/17  |
| P value (Fisher's exact test) |                     | 0.49   | 0.39                      | 0.45                      | 0.61                                  | 0.41                            | 0.51                         | 0.34                               | 0.85                                  | 0.13            | 0.11  |

#

#

<sup>a</sup> reference GenBank sequence NM\_004006.2. Nucleotide numbering reflects cDNA numbering with +1 corresponding to the A of the ATG translation initiation codon in the reference sequence, according to journal guidelines ([www.hgvs.org/mutnomen](http://www.hgvs.org/mutnomen)). The initiation codon is codon 1.

#

#
